# Supplementary material for: A portable visual coffee ring based on carbon dot sensitized lanthanide complex coordination to detect bisphenol A in water
Source: Royal Society of Chemistry journal article supplement (doi:10.1039/d2ra00039c), 2022-01-01
Supplement: d2ra00039c1.pdf [file d2ra00039c1.pdf]

*-Supporting Information-*

**A portable visual coffee ring based on carbon dots sensitized  
lanthanide complexes coordination to detect bisphenol A in water**

Yixiao Li, Qi Min, Yunfei Wang, Xuming Zhuang\*, Xiaowen Hao, Chunyuan Tian,  
Xiuli Fu, Feng Luan\*

College of Chemistry and Chemical Engineering, Yantai University, Yantai 264005,  
China

-----

\*Corresponding author.

E-mail address: xmzhuang@iccas.ac.cn (X. Zhuang); fluan@sina.com (F. Luan).

-----

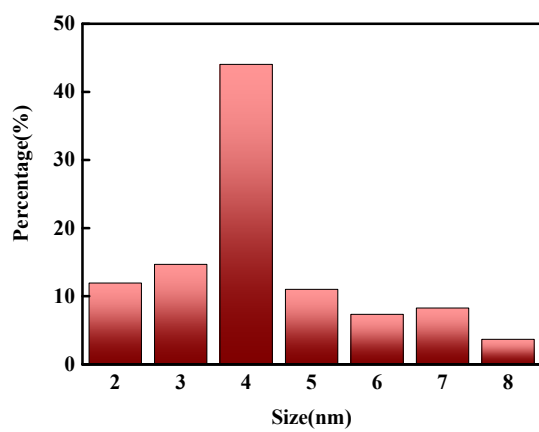

**Fig. S1.** Particle size distribution of CDs.

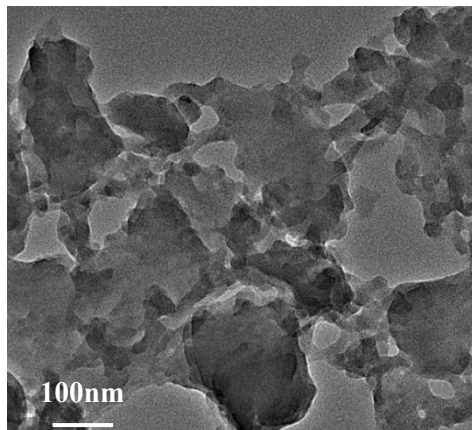

**Fig. S2.** TEM image of Eu-AMP.

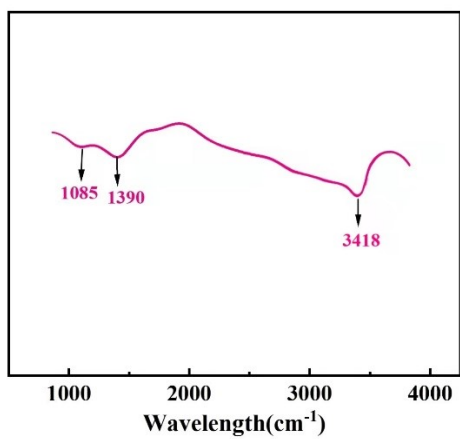

**Fig. S3.** FTIR spectra of Eu-AMP.

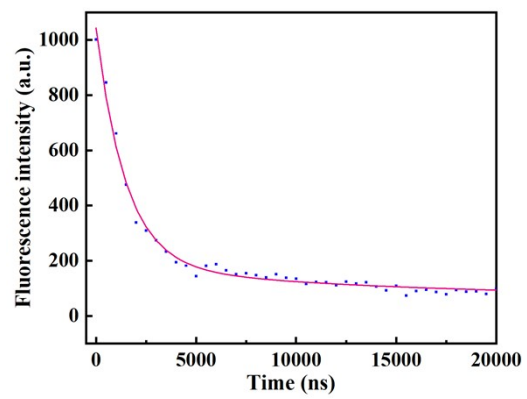

**Fig. S4.** The fluorescence decay curve of CD@Eu-AMP at 623 nm.

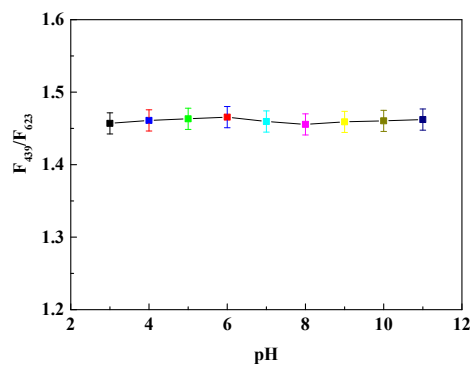

**Fig. S5.** Effects of pH on the fluorescence of CDs@Eu-AMP.

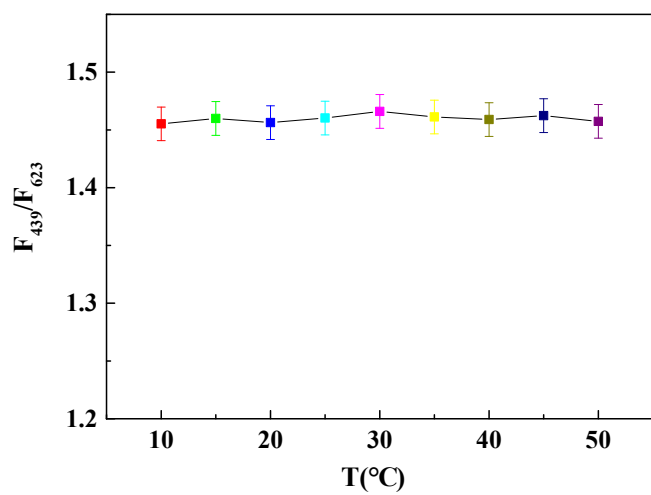

**Fig. S6.** Fluorescence intensity ratio ( $F_{439}/F_{623}$ ) of CD@Eu-AMP for different temperature.

**Table S1.** Comparisons of the linear detection range and limit of different methods for BPA detection.

| Methods      | Materials                      | Detection limit ( $\mu\text{M}$ ) | Linear range ( $\mu\text{M}$ ) | Ref.             |
|--------------|--------------------------------|-----------------------------------|--------------------------------|------------------|
| Fluorescence | $\beta$ -CD functionalized ZnO | 0.19                              | 2-10                           | [1]              |
|              | Berberine/BPA-aptamer          | 0.032                             | 0-1300                         | [2]              |
|              | TMR <sup>a</sup>               | 0.5                               | 0.5-1000                       | [3]              |
|              | M-R-MIPs@d-NPs <sup>b</sup>    | 0.029                             | 0.5-2.0                        | [4]              |
|              | CDs@Eu-AMP <sup>c</sup>        | 0.020                             | 0. 10-100                      | <b>this work</b> |
| SPME-GC-MS   | BSTFA <sup>d</sup>             | 0.070                             | 0.22-43.8                      | [5]              |
|              | AA <sup>e</sup>                | 0.1095                            | 0.43-43.8                      | [5]              |
| CE-MS        |                                | 0.1314                            | 0.43-438                       | [6]              |
| MIP          |                                | 0.066                             | 2.0-10                         | [7]              |

<sup>a</sup> tetramethylrho-damine (TMR) labeled short 35-mer DNA aptamer

<sup>b</sup> Mesoporous structured BPA imprinted ratiometric fluorescence sensors

<sup>c</sup> coordination polymerization of  $\text{Eu}^{3+}$  and 5'-adenosine monophosphate on the surface of carbon dots

<sup>d</sup> bis-(trimethylsilyl)trifluoroacetamide.

<sup>e</sup> acetic anhydride

## References

- [1] V. V. Kadam and R. M. Balakrishnan, *Environ. Sci. Pollut. R.*, 2021, **28**, 11882.
- [2] Y. X. Wei, Y. Y. Zhang, Y. L. Wei, C. Dong and L. Wang, *Anal. Methods*, 2021, **15** 1816.
- [3] L. Y. Liu and Q. Zhao, *J. Environ. Sci.*, 2020, **97**, 19.
- [4] H. Z. Lu and S. F. Xu, *Biosens. Bioelectron.*, 2017, **92** 147.
- [5] P. Viñas, N. Campillo, N. Martínez-Castillo and M. Hernández-Córdoba, *Anal. Bioanal. Chem.*, 2010, **397**, 115.



[6] N. Yahaya, Z. A. Huang, B. J. Yan and D. D. Y. Chen, *Food Chem.*, 2022, **372**, 131220.

[7] A. Lamaoui, J. M. Palacios-Santander, A. Amine and L. Cubillana-Aguilera, *Mater. Sci. Eng. B-Adv.*, 2022, **277**, 115568.
